# Supplementary material for: Beneficial effects of melittin on ovalbumin-induced atopic dermatitis in mouse
Source: PubMed Central journal article supplement (PMC5732199; doi:10.1038/s41598-017-17873-2), 2017-12-15
Supplement: 41598_2017_17873_MOESM1_ESM.pdf [file 41598_2017_17873_MOESM1_ESM.pdf]

## **Beneficial effects of melittin on ovalbumin-induced atopic dermatitis in mouse**

Woon-Hae Kim<sup>1</sup>, Hyun-Jin An<sup>1</sup>, Jung-Yeon Kim<sup>1</sup>, Mi-Gyeong Gwon<sup>1</sup>, Hyemin Gu<sup>1</sup>, Minji Jeon<sup>1</sup>, Woo Jung Sung<sup>1</sup>, Sang Mi Han<sup>2</sup>, Sok Cheon Pak<sup>3</sup>, Min-Kyung Kim<sup>4</sup> and Kwan-Kyu Park<sup>1,\*</sup>

<sup>1</sup>Department of Pathology, College of Medicine, Catholic University of Daegu, Daegu, Korea

<sup>2</sup>Department of Agricultural Biology, National Academy of Agricultural Science, Jeonju-si, Korea

<sup>3</sup>School of Biomedical Sciences, Charles Sturt University, Bathurst, Australia

<sup>4</sup>Department of Pathology, College of Medicine, Dongguk University, Gyeongju-si, Korea

\*Correspondence

Professor Kwan-Kyu Park, Department of Pathology, College of Medicine, Catholic University of Daegu, 33 Duryugongwon-ro 17-gil, Nam-gu, Daegu 42472, Korea. E-mail: [kkpark@cu.ac.kr](mailto:kkpark@cu.ac.kr) Tel.: +82 53 650 4149 Mobile: +82 10 8833 3231

## Supplementary information

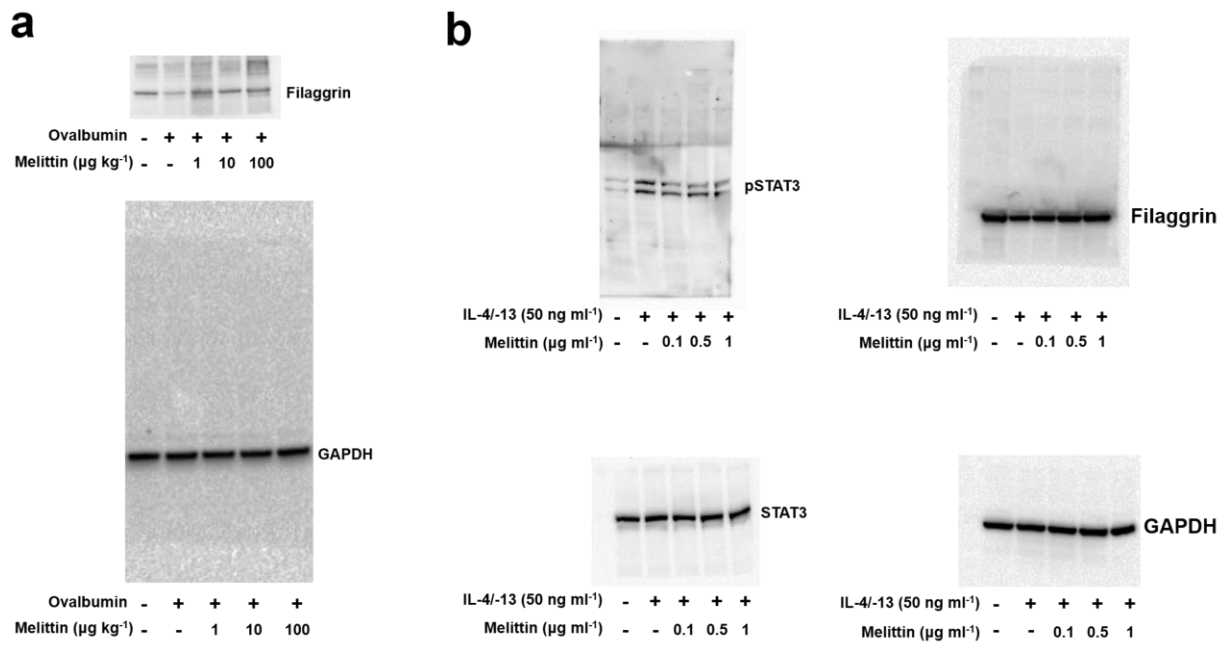

**Supplementary figure S1.** Full-length blots scanned by using ChemiDoc™ XRS+ image analyzer. Full-length blots of Figure 3 (a) and Figure 7 (b) are shown.
